# Supplementary material for: Destruction of mesoscopic chemically modulated domains in single phase high entropy alloy via plastic deformation
Source: PubMed Central journal article supplement (PMC9537164; doi:10.1038/s41598-022-20932-y), 2022-10-06
Supplement: 41598_2022_20932_MOESM1_ESM.pdf [file 41598_2022_20932_MOESM1_ESM.pdf]

## Supplementary information

### SEM/EDS and STEM/EDS

Figure 1 shows SEM/EDS 2D-mapping at  $r = 0\%$ , which does not show the clear segregation of the specific elements, such as grain boundary segregation. As shown in Fig. 2, STEM/EDS 2D-mapping at  $r = 0\%$  does not also show clear modulation of the concentration of specific elements. The selected area diffraction (SAD) with  $[110]$  incident beam shows single fcc phase and no satellite spots for LCO/SRO (the inset in Fig. 2(a)). No precipitates and segregation were observed from the images.

### HAXPES

Figure 3 shows HAXPES spectra of (a) Cr 2p, (b) Mn 2p, (c) Fe 2p, (d) Co 2p, (e) Ni 2p, and (f) valence band.

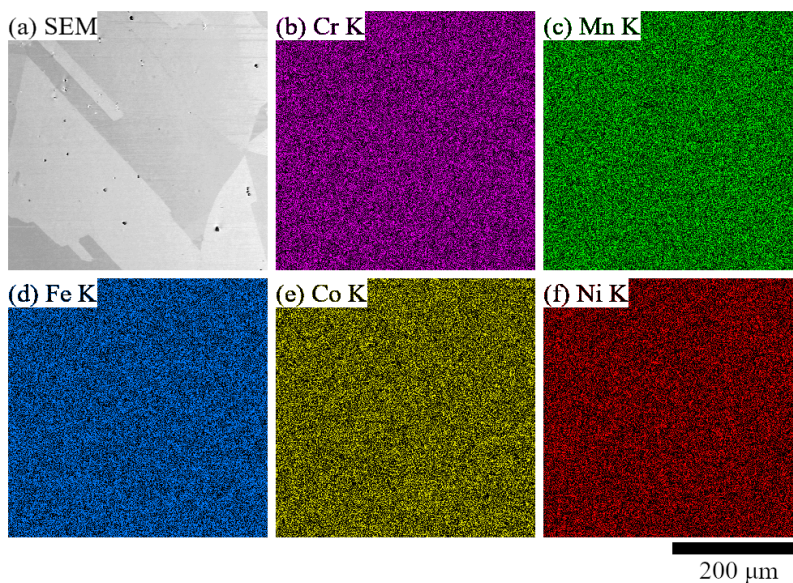

Fig. 1 SEM/EDS observations of (a) SEI and EDS map of (b) Cr K, (c) Mn K, (d) Fe K, (e) Co K and (f) Ni K.

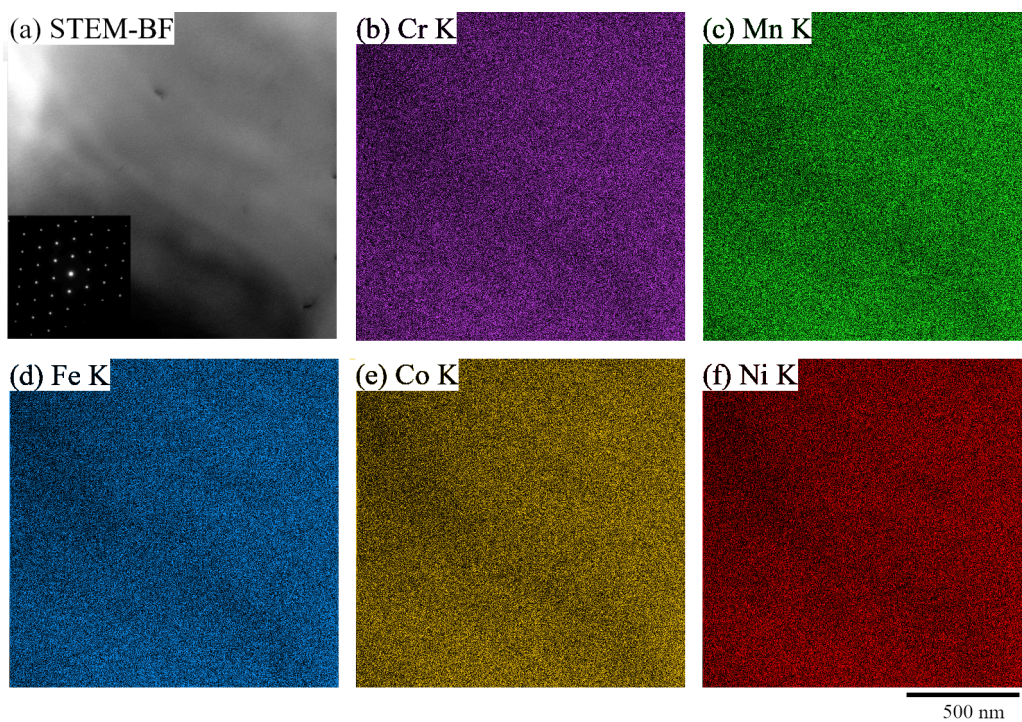

Fig. 2 STEM observation of (a) BF image and [110] incident SAD pattern (inset), and EDS map of (b) Cr K, (c) Mn K, (d) Fe K, (e) Co K and (f) Ni K.

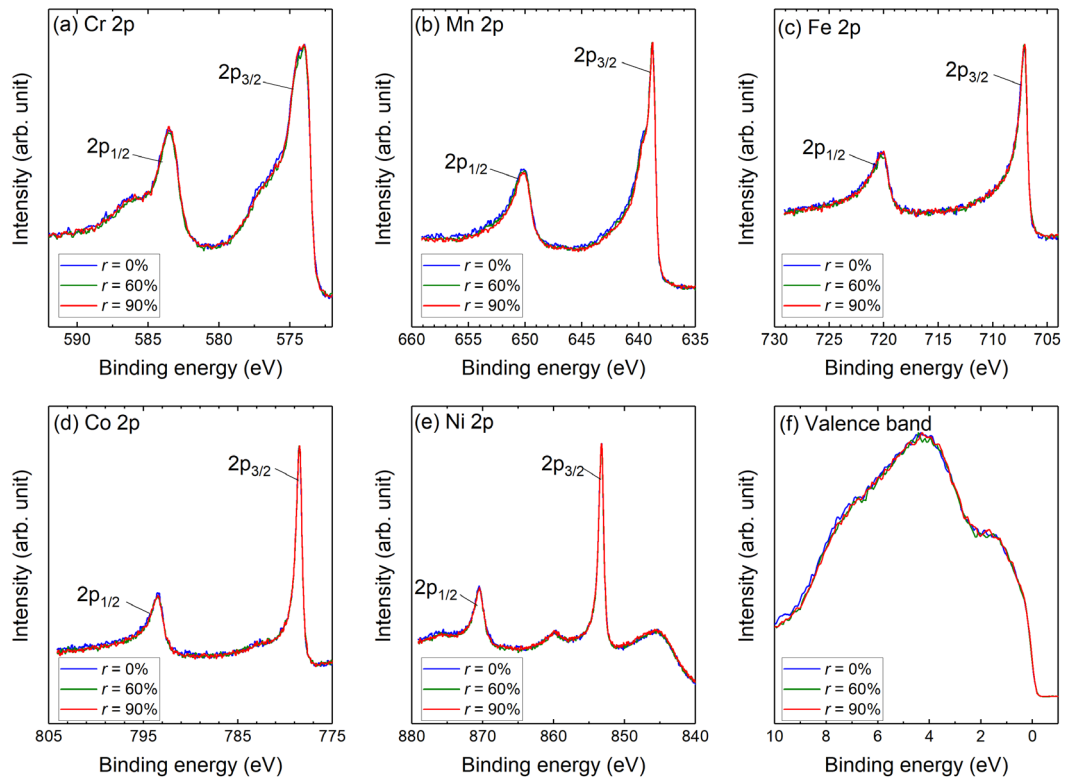

Fig. 3 HAXPES spectra of (a) Cr 2p, (b) Mn 2p, (c) Fe 2p, (d) Co 2p, (e) Ni 2p, and (f) valence band.
